# Supplementary material for: 3.5KJPNv2: an allele frequency panel of 3552 Japanese individuals including the X chromosome
Source: PubMed Central journal article supplement (PMC6581902; doi:10.1038/s41439-019-0059-5), 2019-06-18

## **3.5KJPNv2, An allele frequency panel of 3,552 Japanese Individuals including X chromosome**

Shu Tadaka<sup>1,2,+</sup>, Fumiki Katsuoka<sup>1,2,+</sup>, Masao Ueki<sup>1,3</sup>, Kaname Kojima<sup>1,2,4</sup>, Satoshi Makino<sup>1,2</sup>, Sakae Saito<sup>1,2</sup>, Akihito Otsuki<sup>1,2</sup>, Chinatsu Gocho<sup>1</sup>, Mika Sakurai-Yageta<sup>1,2</sup>, Inaho Danjoh<sup>1,2</sup>, Ikuko N. Motoike<sup>1,2,4</sup>, Yumi Yamaguchi-Kabata<sup>1,2</sup>, Matsuyuki Shiota<sup>1,2,4</sup>, Seizo Koshiba<sup>1,2</sup>, Masao Nagasaki<sup>1,2,4</sup>, Naoko Minegishi<sup>1,2,9</sup>, Atsushi Hozawa<sup>1,2</sup>, Shinichi Kuriyama<sup>1,2,5</sup>, Atsushi Shimizu<sup>6</sup>, Jun Yasuda<sup>1,7</sup>, Nobuo Fuse<sup>1,2</sup>, the Tohoku Medical Megabank Project Study Group<sup>10</sup>, Gen Tamiya<sup>1,3</sup>, Masayuki Yamamoto<sup>1,2,9</sup>, Kengo Kinoshita<sup>1,4,8,9,\*</sup>

1. Tohoku Medical Megabank Organization, Tohoku University, Japan
2. Graduate School of Medicine, Tohoku University, Japan
3. Statistical Genetics Team, RIKEN Center for Advanced Intelligence Project, Japan
4. Graduate School of Information Sciences, Tohoku University, Japan
5. International Research Institute of Disaster Science, Tohoku University, Japan
6. Iwate Tohoku Medical Megabank Organization, Iwate Medical University, Japan
7. Miyagi Cancer Center, Miyagi Hospital Organization, Japan
8. Institute of Development, Aging and Cancer, Tohoku University, Japan
9. Advanced Research Center for Innovations in Next-Generation Medicine, Tohoku University, Japan
10. <https://www.megabank.tohoku.ac.jp/english/a180601/>

+ These authors contributed equally

\* corresponding author: Kengo Kinoshita, 2-1, Seiryō-Machi, Aoba-ku, Sendai 980-8573, Tel: +81-22-274-6040, email: [kengo@ecei.tohoku.ac.jp](mailto:kengo@ecei.tohoku.ac.jp)

## Supplementary tables

### Supplementary Table 1. Summary of samples included in 3.5KJPNv2

(a) The number of participants included in each project along with their presumed origin based on the birth place of their mother.

| Participant group                                | Subtotal     |       |
|--------------------------------------------------|--------------|-------|
| TMM Project                                      |              |       |
| Miyagi or Iwate prefectures                      | 1,507        | 3,342 |
| Other than Miyagi and Iwate prefectures          | 491          |       |
| Origin information is not available              | 894          |       |
| Nagahama Study                                   | 29           |       |
| Individuals recruited in Nagasaki Medical Center | 181          |       |
| <b>Total</b>                                     | <b>3,552</b> |       |

(b) Participants' gender and sex. Age information for 14 participants was missing.

| Age ranges            | Male | Female | Total |
|-----------------------|------|--------|-------|
| <b>29 and younger</b> | 66   | 173    | 239   |
| <b>30-39</b>          | 184  | 329    | 513   |
| <b>40-49</b>          | 124  | 243    | 367   |
| <b>50-59</b>          | 219  | 402    | 621   |
| <b>60-69</b>          | 629  | 653    | 1,280 |
| <b>70-79</b>          | 312  | 194    | 506   |
| <b>80 and older</b>   | 7    | 5      | 12    |

**Supplementary Table 2. Overview of outliers found in allele frequency comparison plots in Fig. 2(c).** The “Position” column shows the chromosomal position of a variant, the “Ref/Alt” column gives the reference allele and the alternative allele, the “3.5KJPNv2” column gives the allele frequency observed in 3.5KJPNv2, the “gnomAD EAS” column gives the allele frequency observed in gnomAD EAS.

|                  | <b>Position</b> | <b>Ref/Alt</b> | <b>3.5KJPNv2</b> | <b>gnomAD EAS</b> | <b>Note</b>                        |
|------------------|-----------------|----------------|------------------|-------------------|------------------------------------|
| <b>Fig. 2(c)</b> | 18231907        | C/T            | 0.3793           | 0.1164            | rs45563640,<br>BEND2<br>synonymous |
|                  | 15792527        | T/A            | 0.5129           | 0.2445            | rs4364812,<br>CA5B splice region   |
|                  | 39922359        | A/G            | 0.7161           | 0.2774            | rs3810694,<br>BCOR intron          |
|                  | 135961587       | G/T            | 0.7795           | 0.5047            | rs2011584,<br>RBMX missense        |
|                  | 69504078        | T/G            | 0.8687           | 0.5768            | rs12556489,<br>RAB41 intron        |
|                  | 153048657       | A/C            | 0.8273           | 0.5273            | rs2314343,<br>SRPK3 intron         |
|                  | 228940          | A/G            | 0.2263           | 0.5000            | rs62580112,<br>GTPBP6 intron       |
|                  | 100749127       | A/G            | 0.3637           | 0.6647            | rs5951336,<br>ARMCX4 missense      |
|                  | 28513629        | G/C            | 0.8209           | 1.0000            | rs5951336                          |

## Supplementary Figures

Supplementary Figure 1. Histogram of concordance ratio between whole genome sequencing results and SNP array genotypes.

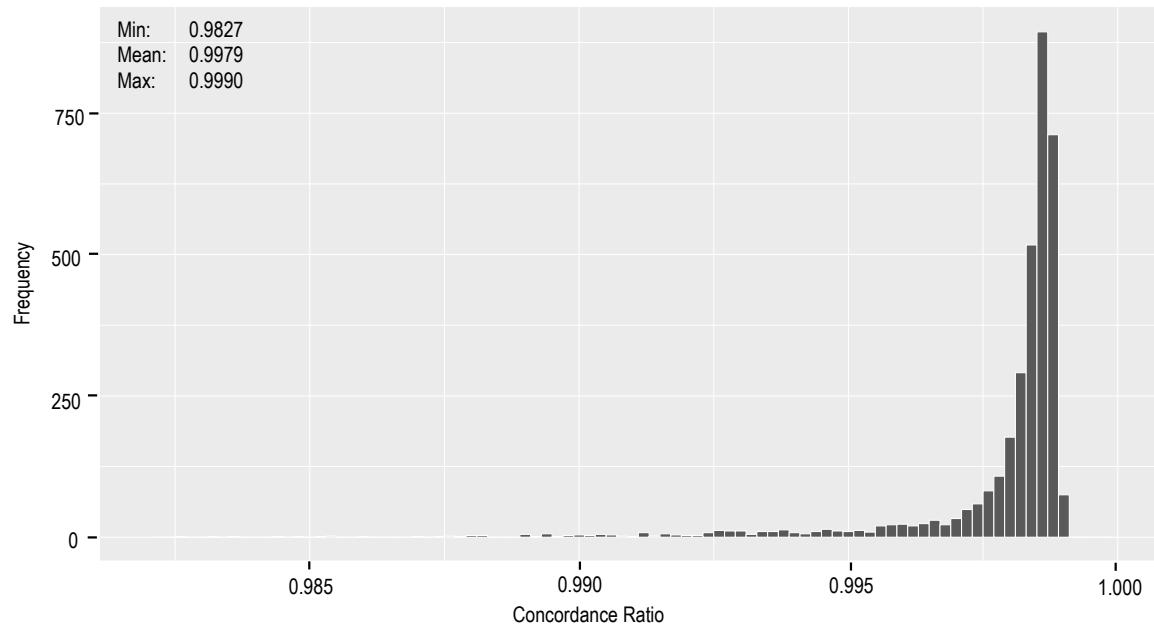

Supplement: 41439_2019_59_MOESM1_ESM.pdf [file 41439_2019_59_MOESM1_ESM.pdf]
